# Supplementary material for: Anemia in Patients with Severe Aortic Stenosis
Source: PubMed Central journal article supplement (PMC6374463; doi:10.1038/s41598-018-36066-z), 2019-02-13
Supplement: 41598_2018_36066_MOESM1_ESM.pdf [file 41598_2018_36066_MOESM1_ESM.pdf]

## Supplementary Information

### Anemia in Patients with Severe Aortic Stenosis

Kazuya Nagao, MD<sup>1</sup>, Tomohiko Taniguchi, MD<sup>2</sup>, Takeshi Morimoto, MD, MPH<sup>3</sup>,  
Hiroki Shiomi, MD<sup>2</sup>, Kenji Ando, MD<sup>4</sup>, Norio Kanamori, MD<sup>5</sup>, Koichiro Murata, MD<sup>6</sup>,  
Takeshi Kitai, MD<sup>7</sup>, Yuichi Kawase, MD<sup>8</sup>, Chisato Izumi, MD<sup>9</sup>, Makoto Miyake, MD<sup>9</sup>,  
Hirokazu Mitsuoka, MD<sup>10</sup>, Masashi Kato, MD<sup>11</sup>, Yutaka Hirano, MD<sup>12</sup>, Shintaro  
Matsuda, MD<sup>2</sup>, Tsukasa Inada, MD<sup>1</sup>, Tomoyuki Murakami, MD<sup>13</sup>, Yasuyo Takeuchi,  
MD<sup>14</sup>, Keiichiro Yamane, MD<sup>15</sup>, Mamoru Toyofuku, MD<sup>16</sup>, Mitsuru Ishii, MD<sup>17</sup>, Eri  
Minamino-Muta, MD<sup>18</sup>, Takao Kato, MD<sup>18</sup>, Moriaki Inoko, MD<sup>18</sup>, Tomoyuki Ikeda,  
MD<sup>19</sup>, Akihiro Komasa, MD<sup>20</sup>, Katsuhisa Ishii, MD<sup>20</sup>, Kozo Hotta, MD<sup>21</sup>, Nobuya  
Higashitani, MD<sup>22</sup>, Yoshihiro Kato, MD<sup>23</sup>, Yasutaka Inuzuka, MD<sup>24</sup>, Chiyo Maeda,  
MD<sup>25</sup>, Toshikazu Jinnai, MD<sup>22</sup>, Yuko Morikami<sup>26</sup>, MD, Naritatsu Saito, MD<sup>2</sup>, Kenji  
Minatoya, MD<sup>27</sup>, Takeshi Kimura, MD<sup>2</sup>, on behalf of the CURRENT AS Registry

Investigators

### **Definitions of the clinical events**

Major bleeding was defined as overt bleeding plus a decrease in hemoglobin of 3 g/dl to <5 g/dl or bleeding requiring transfusion (BARC type 3a). Life-threatening/disabling bleeding events were defined as overt bleeding plus a decrease in hemoglobin  $\geq$ 5 g/dl or bleeding requiring surgical intervention or intravenous vasoactive agents (BARC type 3b), bleeding in a critical organ such as intracranial, intraocular (BARC type 3c) or fatal bleeding (BARC type 5) <sup>1, 2</sup>. Death was regarded as cardiovascular in origin unless obvious non-cardiovascular causes could be identified. Aortic valve (AV) procedure-related death was defined as any death during the hospitalization for surgical aortic valve replacement (AVR) or trans-catheter aortic valve implantation (TAVI). AV-related death included AV procedure-related death, sudden death, and death due to heart failure presumably related to aortic stenosis <sup>3</sup>.

### **Supplemental Reference**

1. Mehran R, Rao SV, Bhatt DL, Gibson CM, Caixeta A, Eikelboom J, Kaul S, Wiviott SD, Menon V, Nikolsky E, Serebruany V, Valgimigli M, Vranckx P, Taggart D, Sabik JF, Cutlip DE, Krucoff MW, Ohman EM, Steg PG, White H. Standardized bleeding

definitions for cardiovascular clinical trials: A consensus report from the bleeding academic research consortium. *Circulation*. 2011;123(23):2736-47.

2. Kappetein AP, Head SJ, Genereux P, Piazza N, van Mieghem NM, Blackstone EH, Brott TG, Cohen DJ, Cutlip DE, van Es GA, Hahn RT, Kirtane AJ, Krucoff MW, Kodali S, Mack MJ, Mehran R, Rodes-Cabau J, Vranckx P, Webb JG, Windecker S, Serruys PW, Leon MB. Updated standardized endpoint definitions for transcatheter aortic valve implantation: The valve academic research consortium-2 consensus document. *J Am Coll Cardiol*. 2012;60(15):1438-54

3. Taniguchi T, Morimoto T, Shiomi H, Ando K, Kanamori N, Murata K, Kitai T, Kawase Y, Izumi C, Miyake M, Mitsuoka H, Kato M, Hirano Y, Matsuda S, Nagao K, Inada T, Murakami T, Takeuchi Y, Yamane K, Toyofuku M, Ishii M, Minamino-Muta E, Kato T, Inoko M, Ikeda T, Komasa A, Ishii K, Hotta K, Higashitani N, Kato Y, Inuzuka Y, Maeda C, Jinnai T, Morikami Y, Sakata R, Kimura T, Investigators CAR. Initial surgical versus conservative strategies in patients with asymptomatic severe aortic stenosis. *J Am Coll Cardiol*. 2015;66(25):2827-38.

**Supplemental Table S1. Univariate and Multivariable Logistic Regression Analyses for Factors Associated with Anemia**

| Variables                 | Univariate Analyses |          |                  |         | Multivariable Analyses |         |
|---------------------------|---------------------|----------|------------------|---------|------------------------|---------|
|                           | Anemia              |          | OR (95% CI)      | P value | OR (95% CI)            | P value |
|                           | Yes                 | No       |                  |         |                        |         |
|                           | N=2117              | N=1286   |                  |         |                        |         |
| Age $\geq$ 80 years       | 1164 (55)           | 393 (31) | 2.78 (2.40-3.21) | <0.001  | 2.27 (1.94-2.67)       | <0.001  |
| Women                     | 1347 (64)           | 762 (59) | 1.3 (1.04-1.39)  | 0.01    | 1.51 (1.26-1.80)       | <0.001  |
| BMI <22 kg/m <sup>2</sup> | 1432 (68)           | 634 (49) | 2.15 (1.87-2.48) | <0.001  | 1.91 (1.64-2.24)       | <0.001  |
| Current smoking           | 88 (4)              | 87 (7)   | 0.6 (0.44-0.81)  | 0.001   | 0.9 (0.64-1.24)        | 0.5     |
| Coronary artery disease   | 702 (33)            | 341 (27) | 1.37 (1.18-1.60) | <0.001  | 1.32 (1.11-1.57)       | 0.002   |
| Prior HF                  | 433 (20)            | 158 (12) | 1.84 (1.51-2.24) | <0.001  | 1.36 (1.09-1.70)       | 0.007   |

|                                            |           |          |                  |        |                  |        |
|--------------------------------------------|-----------|----------|------------------|--------|------------------|--------|
| Prior symptomatic stroke                   | 302 (14)  | 166 (13) | 1.12 (0.92-1.38) | 0.3    | 0.9 (0.73-1.14)  | 0.4    |
| Atrial fibrillation or flutter             | 483 (23)  | 270 (21) | 1.11 (0.94-1.32) | 0.2    | 0.9 (0.71-1.05)  | 0.1    |
| Malignancy                                 | 330 (16)  | 145 (11) | 1.45 (1.18-1.79) | <0.001 | 1.44 (1.15-1.81) | 0.002  |
| Aortic/peripheral disease                  | 379 (18)  | 156 (12) | 1.58 (1.29-1.94) | <0.001 | 1.4 (1.11-1.73)  | 0.004  |
| Liver cirrhosis                            | 29 (1)    | 8 (1)    | 2.22 (1.06-5.22) | 0.03   | 2.63 (1.19-6.48) | 0.02   |
| Chronic lung disease (moderate or severe)  | 41 (3)    | 64 (3)   | 0.95 (0.64-1.42) | 0.8    | 0.9 (0.58-1.39)  | 0.6    |
| Creatinine level above median (0.83 mg/dl) | 1358 (73) | 492 (27) | 2.89 (2.50-3.33) | <0.001 | 3.06 (2.59-3.62) | <.0001 |
| Vmax >5 m/s                                | 402 (19)  | 261 (20) | 0.9 (0.77-1.10)  | 0.4    | 1.09 (0.90-1.32) | 0.4    |
| LVEF <40 %                                 | 190 (9)   | 90 (7)   | 1.31 (1.01-1.71) | 0.04   | 0.88 (0.66-1.18) | 0.4    |

|                                                       |          |          |                  |        |                  |      |
|-------------------------------------------------------|----------|----------|------------------|--------|------------------|------|
| Any combined valvular disease<br>(moderate or severe) | 947 (45) | 475 (37) | 1.38 (1.20-1.59) | <0.001 | 1.07 (0.91-1.26) | 0.4  |
| TR pressure gradient $\geq$ 40 mm Hg                  | 409 (19) | 158 (12) | 1.71 (1.40-2.09) | <0.001 | 1.34 (1.07-1.68) | 0.01 |

---

Values are number (%), and OR (95% CI).

BMI=body mass index; CI=Confidence interval; HF=heart failure; LVEF=left ventricular ejection fraction; OR=odds ratio; TR=tricuspid regurgitation.

**Supplemental Table S2. Detailed Data on Baseline Characteristics According to the Status of Anemia**

| <b>Variables</b>                | <b>No anemia</b>                                               | <b>Mild anemia</b>                                         | <b>Moderate/Severe anemia</b> | <b>P value</b> |
|---------------------------------|----------------------------------------------------------------|------------------------------------------------------------|-------------------------------|----------------|
|                                 | Hb $\geq$ 13.0 g/dl for men, and<br>$\geq$ 12.0 g/dl for women | Hb 11.0–12.9 g/dl for men,<br>and 11.0–11.9 g/dl for women | Hb $\leq$ 10.9 g/dl           |                |
|                                 | N=1286                                                         | N=835                                                      | N=1282                        |                |
| <b>Clinical characteristics</b> |                                                                |                                                            |                               |                |
| Age, y* †                       | 74.5 $\pm$ 9.9                                                 | 78.0 $\pm$ 8.7                                             | 81.4 $\pm$ 8.7                | <0.001         |
| Age $\geq$ 80                   | 393 (31)                                                       | 372 (45)                                                   | 792 (62)                      | <0.001         |
| Men*                            | 524 (41)                                                       | 399 (48)                                                   | 371 (29)                      | <0.001         |
| BMI, kg/m <sup>2</sup>          | 22.7 $\pm$ 3.7                                                 | 22.0 $\pm$ 3.7                                             | 20.6 $\pm$ 3.6                | <0.001         |
| BMI <22 kg/m <sup>2</sup> *     | 634 (49)                                                       | 491 (59)                                                   | 941 (73)                      | <0.001         |

|                              |          |          |          |        |
|------------------------------|----------|----------|----------|--------|
| Hypertension*                | 879 (68) | 598 (72) | 923 (72) | 0.09   |
| Current smoking*             | 87 (7)   | 51 (6)   | 37 (3)   | <0.001 |
| History of smoking           | 323 (25) | 222 (27) | 210 (16) | <0.001 |
| Dyslipidemia                 | 514 (40) | 308 (37) | 372 (29) | <0.001 |
| On statin therapy            | 353 (27) | 238 (29) | 288 (22) | 0.002  |
| Diabetes mellitus            | 296 (23) | 209 (25) | 323 (25) | 0.4    |
| On insulin therapy*          | 39 (3)   | 59 (7)   | 78 (6)   | <0.001 |
| Coronary artery disease*     | 341 (27) | 304 (36) | 398 (31) | <0.001 |
| Prior PCI                    | 126 (10) | 132 (16) | 189 (15) | <0.001 |
| Prior CABG                   | 38 (3)   | 58 (7)   | 72 (6)   | <0.001 |
| Prior myocardial infarction* | 73 (6)   | 78 (9)   | 132 (10) | <0.001 |



|                                     |                  |                  |                |        |
|-------------------------------------|------------------|------------------|----------------|--------|
| Prior open heart surgery            | 73 (6)           | 82 (10)          | 111 (9)        | <0.001 |
| Prior HF                            | 158 (12)         | 119 (14)         | 314 (24)       | <0.001 |
| Prior symptomatic stroke*           | 166 (13)         | 128 (15)         | 174 (14)       | 0.30   |
| Atrial fibrillation or flutter* †   | 270 (21)         | 172 (21)         | 311 (24)       | 0.06   |
| Aortic/peripheral vascular disease* | 156 (12)         | 152 (18)         | 227 (18)       | <0.001 |
| Serum creatinine, mg/dl*            | 0.8 (0.6–1.0)    | 0.9 (0.7–1.2)    | 1.1 (0.8–2.3)  | <0.001 |
| Creatinine >2 mg/dl                 | 40 (3)           | 124 (15)         | 360 (28)       | <0.001 |
| eGFR, ml/min/1.73m <sup>2</sup>     | 64 ± 22          | 51 ± 26          | 39 ± 27        | 0.001  |
| Hemodialysis*                       | 36 (3)           | 105 (13)         | 230 (18)       | <0.001 |
| Hemoglobin, g/dl                    | 13.4 (12.7–14.2) | 11.6 (11.3–11.9) | 9.7 (8.7–10.4) | <0.001 |
| BNP, pg/ml                          | 143 (57–432)     | 216 (97–615)     | 554 (202–1357) | <0.001 |

|                                            |                  |                 |                 |        |
|--------------------------------------------|------------------|-----------------|-----------------|--------|
| CRP, mg/dl                                 | 0.13 (0.06–0.36) | 0.2 (0.08–0.64) | 0.43 (0.1–2.2)  | <0.001 |
| Liver cirrhosis (Child-Pugh B or C)*       | 8 (1)            | 8 (1)           | 21 (2)          | 0.04   |
| Malignancy                                 | 145 (11)         | 114 (14)        | 216 (17)        | <0.001 |
| Malignancy currently under treatment* †    | 33 (3)           | 39 (5)          | 71 (6)          | <0.001 |
| Chronic lung disease                       | 159 (12)         | 88 (11)         | 119 (9)         | 0.04   |
| Chronic lung disease (moderate or severe)* | 41 (3)           | 21 (3)          | 43 (3)          | 0.5    |
| Logistic EuroSCORE, %                      | 7.0 (4.2–12.0)   | 9.4 (6.2–16.0)  | 14.2 (9.0–23.0) | <0.001 |
| EuroSCORE II, %                            | 1.9 (1.2–3.5)    | 2.8 (1.7–4.5)   | 4.1 (2.7–6.8)   | <0.001 |
| STS score (PROM), %                        | 2.5 (1.6–4.0)    | 3.8 (2.4–5.9)   | 6.1 (3.7–1.0)   | <0.001 |
| <b>Echocardiographic variables</b>         |                  |                 |                 |        |
| Vmax, m/s                                  | 4.2±0.9          | 4.2±0.9         | 4.1±0.9         | 0.01   |

|                                                                                           |           |           |           |        |
|-------------------------------------------------------------------------------------------|-----------|-----------|-----------|--------|
| Vmax >5 m/s                                                                               | 261 (20)  | 171 (20)  | 231 (18)  | 0.2    |
| Vmax >4 m/s* †                                                                            | 790 (61)  | 491 (59)  | 713 (56)  | 0.01   |
| Mean aortic PG, mmHg                                                                      | 42±20     | 42±21     | 41±20     | 0.09   |
| AVA (equation of continuity), cm <sup>2</sup>                                             | 0.73±0.18 | 0.72±0.18 | 0.69±0.19 | <0.001 |
| Low gradient AS (Vmax ≤4m/s and mean<br>aortic PG ≤40mmHg, but AVA <1.0 cm <sup>2</sup> ) | 537 (42)  | 356 (43)  | 597 (47)  | 0.04   |
| LV end-diastolic diameters, mm                                                            | 46±7      | 46±7      | 46±7      | 0.5    |
| LV end-systolic diameters, mm                                                             | 30±8      | 30±8      | 31±8      | <0.001 |
| LVEF, %*                                                                                  | 64±13     | 63±13     | 61±14     | <0.001 |
| <40%                                                                                      | 90 (7)    | 57 (7)    | 133 (10)  | 0.002  |
| <50%                                                                                      | 178 (14)  | 117 (14)  | 263 (21)  | <0.001 |

|                                                     |          |          |          |        |
|-----------------------------------------------------|----------|----------|----------|--------|
| IVST in diastole, mm                                | 11.5±2.4 | 11.5±2.3 | 11.2±2.2 | 0.002  |
| PWT in diastole, mm                                 | 11.1±2.0 | 11.1±2.2 | 10.9±2.0 | 0.04   |
| Any combined valvular disease (moderate or severe)* | 475 (37) | 324 (39) | 623 (49) | <0.001 |
| †                                                   |          |          |          |        |
| Moderate or severe AR                               | 280 (22) | 174 (21) | 263 (21) | 0.7    |
| Moderate or severe MS                               | 51 (4)   | 24 (3)   | 46 (4)   | 0.4    |
| Moderate or severe MR                               | 191 (15) | 152 (18) | 362 (28) | <0.001 |
| Moderate or severe TR                               | 159 (12) | 124 (15) | 289 (23) | <0.001 |
| TR pressure gradient ≥40 mm Hg*                     | 158 (12) | 117 (14) | 292 (23) | <0.001 |
| <b>Symptomatic status at index UCG</b>              |          |          |          |        |
| Chest pain                                          | 176 (14) | 142 (17) | 154 (12) | 0.02   |

|                                               |          |          |          |        |
|-----------------------------------------------|----------|----------|----------|--------|
| Syncope                                       | 66 (5)   | 53 (6)   | 74 (6)   | 0.5    |
| HF                                            | 494 (38) | 302 (36) | 727 (57) | <0.001 |
| NYHA III or IV                                | 172 (35) | 127 (42) | 414 (57) | <0.001 |
| Asymptomatic                                  | 637 (50) | 407 (49) | 455 (35) | <0.001 |
| Admission for HF at index echocardiography* † | 194 (15) | 123 (15) | 454 (35) | <0.001 |
| <b>Therapeutic strategy*</b>                  |          |          |          |        |
| Initial AVR                                   | 549 (43) | 316 (38) | 313 (24) | <0.001 |
| Conservative                                  | 737 (57) | 519 (62) | 969 (76) | <0.001 |

---

Values are mean  $\pm$  SD, median (interquartile range), or number (%).

The values of CRP and BNP were obtained in 2914 (76%) and 1801 (47%) patients, respectively. The NYHA class was obtained in 1500 (44.1%) patients.

\* † Potential risk-adjusting variables selected for the Cox proportional hazards models in the entire population (\*) and in the stratified analyses across the initial AVR/conservative strata ( † ).

AR=aortic regurgitation; AS=aortic stenosis; AVA=aortic valve area; AVR=aortic valve replacement; BMI=body mass index; BNP= brain-derived natriuretic peptide; CABG=coronary artery bypass grafting; CRP=C-reactive protein; eGFR=estimate glomerular filtration rate; Hb=hemoglobin; HF=heart failure; IVST=interventricular septum thickness, LV=left ventricular; LVEF=left ventricular ejection fraction; MR=mitral regurgitation; MS=mitral stenosis; NYHA=New York Heart Association; PCI=percutaneous coronary intervention; PG=pressure gradient; PROM=predicted risk of mortality; PWT=posterior wall thickness; STS=Society of Thoracic Surgeons; TR=tricuspid regurgitation; UCG=ultrasound echocardiography; and Vmax=peak aortic jet velocity.

**Supplemental Table S3. List of adjusting variable in the Cox proportional hazard models**

---

| <b>Adjusting variables in the Cox proportional hazard models</b> | <b>Adjusting variables in the parsimonious Cox proportional hazard models</b> |
|------------------------------------------------------------------|-------------------------------------------------------------------------------|
| Age                                                              | Age                                                                           |
| Men                                                              | Vmax >4m/s                                                                    |
| BMI <22 kg/m <sup>2</sup>                                        | Any combined valvular disease (moderate or severe)                            |
| Therapeutic strategy                                             | Atrial fibrillation or flutter                                                |
| LVEF                                                             | Malignancy currently under treatment                                          |
| TR pressure gradient ≥40 mmHg                                    | Admission for HF at index echocardiography                                    |
| Vmax >4m/s                                                       |                                                                               |
| Any combined valvular disease (moderate or severe)               |                                                                               |

---

Prior myocardial infarction

Prior symptomatic stroke

Atrial fibrillation or flutter

Chronic lung disease (moderate or severe)

Malignancy currently under treatment

Aortic/peripheral vascular disease

Liver cirrhosis (Child-Pugh B or C)

Hemodialysis

Admission for HF at index echocardiography

Hypertension

Current smoking



On insulin therapy

Coronary artery disease

Serum creatinine

---

BMI=body mass index; HF=heart failure; LVEF=left ventricular ejection fraction; TR=tricuspid regurgitation; Vmax=peak aortic jet velocity.

Supplemental Figure S1

A.

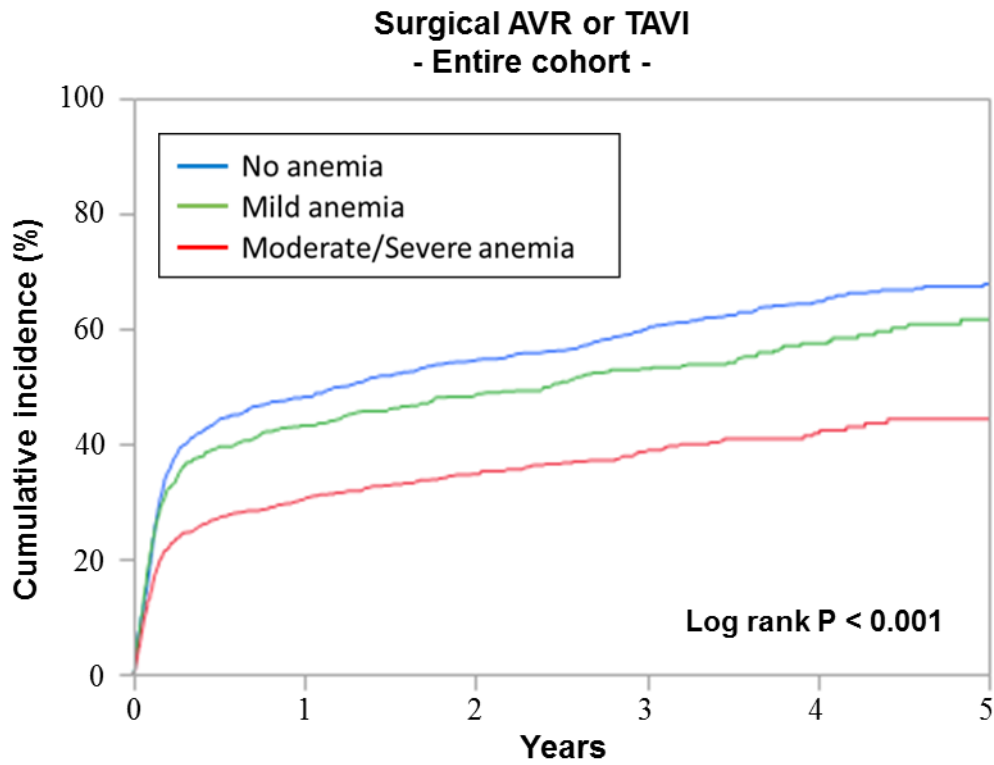

|                               | 0    | 1 year | 2 year | 3 year | 4 year | 5 year |
|-------------------------------|------|--------|--------|--------|--------|--------|
| <b>No anemia</b>              |      |        |        |        |        |        |
| N of patients at risk         | 1286 | 585    | 458    | 309    | 180    | 81     |
| N of patients with event      |      | 597    | 667    | 715    | 745    | 757    |
| Cumulative incidence          |      | 48%    | 55%    | 60%    | 65%    | 68%    |
| <b>Mild anemia</b>            |      |        |        |        |        |        |
| N of patients at risk         | 835  | 385    | 297    | 198    | 96     | 42     |
| N of patients with event      |      | 342    | 375    | 398    | 411    | 418    |
| Cumulative incidence          |      | 43%    | 49%    | 53%    | 57%    | 62%    |
| <b>Moderate/Severe anemia</b> |      |        |        |        |        |        |
| N of patients at risk         | 1282 | 573    | 390    | 236    | 114    | 50     |
| N of patients with event      |      | 349    | 380    | 400    | 409    | 413    |
| Cumulative incidence          |      | 30%    | 35%    | 39%    | 42%    | 44%    |

B.

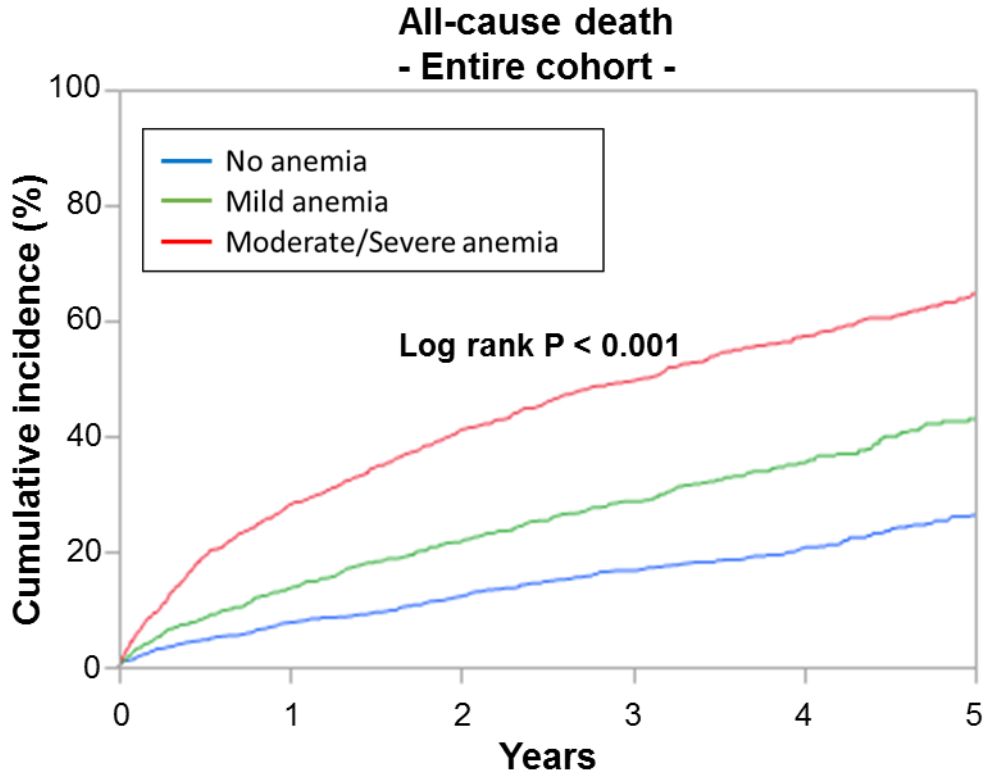

|                               | 0    | 1 year | 2 year | 3 year | 4 year | 5 year |
|-------------------------------|------|--------|--------|--------|--------|--------|
| <b>No anemia</b>              |      |        |        |        |        |        |
| N of patients at risk         | 1286 | 1144   | 1061   | 808    | 517    | 279    |
| N of patients with event      |      | 98     | 153    | 203    | 234    | 263    |
| Cumulative incidence          |      | 8%     | 12%    | 17%    | 21%    | 26%    |
| <b>Mild anemia</b>            |      |        |        |        |        |        |
| N of patients at risk         | 835  | 685    | 598    | 439    | 259    | 134    |
| N of patients with event      |      | 111    | 175    | 224    | 258    | 282    |
| Cumulative incidence          |      | 14%    | 22%    | 29%    | 35%    | 43%    |
| <b>Moderate/Severe anemia</b> |      |        |        |        |        |        |
| N of patients at risk         | 1282 | 857    | 672    | 459    | 239    | 114    |
| N of patients with event      |      | 345    | 499    | 588    | 646    | 677    |
| Cumulative incidence          |      | 28%    | 41%    | 50%    | 57%    | 65%    |

C.

### Cardiovascular death - Entire cohort -

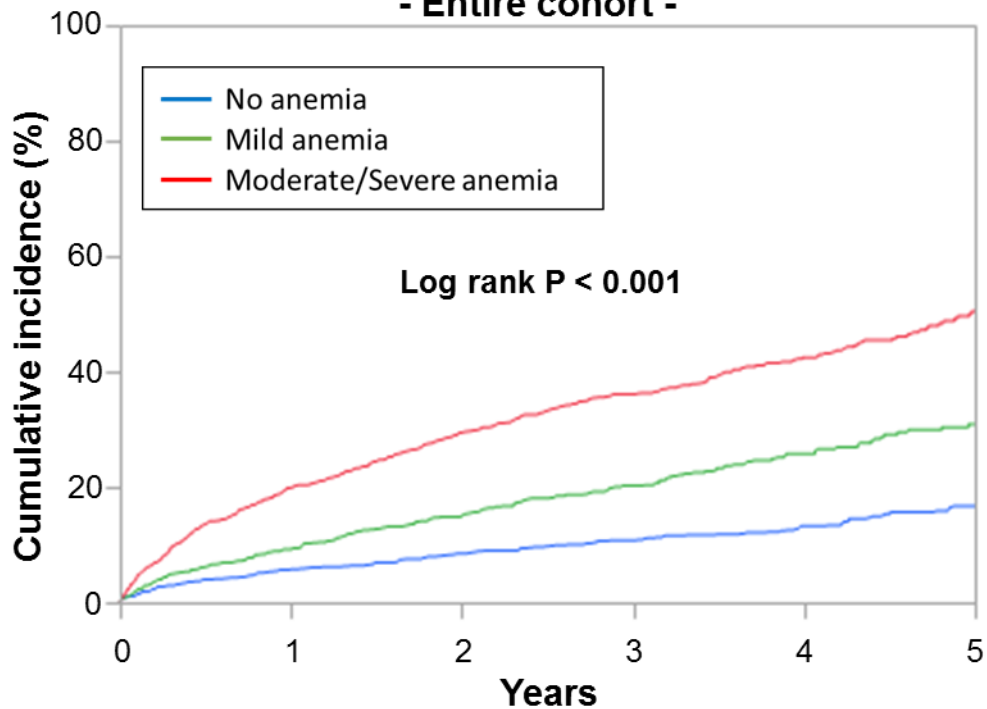

|                               | 0    | 1 year | 2 year | 3 year | 4 year | 5 year |
|-------------------------------|------|--------|--------|--------|--------|--------|
| <b>No anemia</b>              |      |        |        |        |        |        |
| N of patients at risk         | 1286 | 1144   | 1061   | 808    | 517    | 279    |
| N of patients with event      |      | 72     | 105    | 129    | 147    | 163    |
| Cumulative incidence          |      | 6%     | 9%     | 11%    | 13%    | 17%    |
| <b>Mild anemia</b>            |      |        |        |        |        |        |
| N of patients at risk         | 835  | 685    | 598    | 439    | 259    | 134    |
| N of patients with event      |      | 73     | 117    | 150    | 175    | 189    |
| Cumulative incidence          |      | 9%     | 15%    | 20%    | 26%    | 31%    |
| <b>Moderate/Severe anemia</b> |      |        |        |        |        |        |
| N of patients at risk         | 1282 | 857    | 672    | 459    | 239    | 114    |
| N of patients with event      |      | 233    | 332    | 388    | 424    | 448    |
| Cumulative incidence          |      | 20%    | 30%    | 36%    | 42%    | 50%    |

D.

### Heart failure hospitalization - Entire cohort -

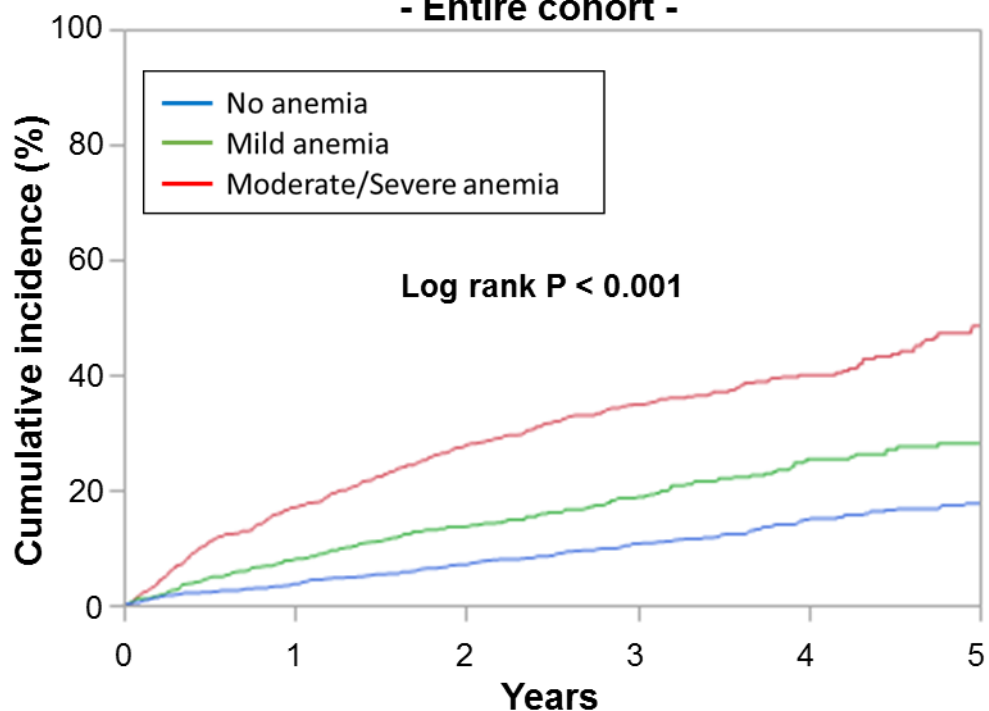

|                               | 0    | 1 year | 2 year | 3 year | 4 year | 5 year |
|-------------------------------|------|--------|--------|--------|--------|--------|
| <b>No anemia</b>              |      |        |        |        |        |        |
| N of patients at risk         | 1286 | 1114   | 1011   | 751    | 466    | 256    |
| N of patients with event      |      | 45     | 73     | 35     | 146    | 158    |
| Cumulative incidence          |      | 4%     | 7%     | 11%    | 15%    | 18%    |
| <b>Mild anemia</b>            |      |        |        |        |        |        |
| N of patients at risk         | 835  | 648    | 546    | 385    | 225    | 118    |
| N of patients with event      |      | 61     | 99     | 127    | 152    | 158    |
| Cumulative incidence          |      | 8%     | 14%    | 19%    | 25%    | 28%    |
| <b>Moderate/Severe anemia</b> |      |        |        |        |        |        |
| N of patients at risk         | 1282 | 770    | 568    | 367    | 181    | 78     |
| N of patients with event      |      | 179    | 273    | 322    | 344    | 362    |
| Cumulative incidence          |      | 17%    | 28%    | 35%    | 40%    | 48%    |

E.

**Aortic valve-related death  
- Entire cohort -**

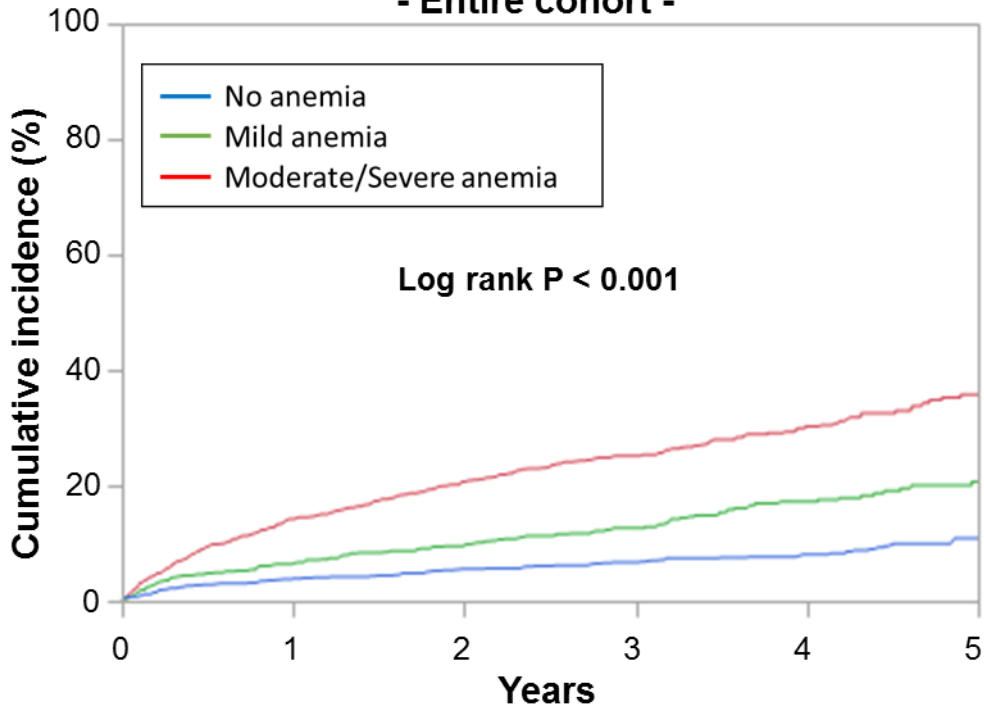

|                               | 0    | 1 year | 2 year | 3 year | 4 year | 5 year |
|-------------------------------|------|--------|--------|--------|--------|--------|
| <b>No anemia</b>              |      |        |        |        |        |        |
| N of patients at risk         | 1286 | 1144   | 1062   | 808    | 517    | 279    |
| N of patients with event      |      | 48     | 68     | 79     | 89     | 101    |
| Cumulative incidence          |      | 4%     | 6%     | 7%     | 8%     | 11%    |
| <b>Mild anemia</b>            |      |        |        |        |        |        |
| N of patients at risk         | 835  | 685    | 598    | 439    | 260    | 134    |
| N of patients with event      |      | 51     | 74     | 92     | 111    | 119    |
| Cumulative incidence          |      | 6%     | 10%    | 13%    | 17%    | 21%    |
| <b>Moderate/Severe anemia</b> |      |        |        |        |        |        |
| N of patients at risk         | 1282 | 857    | 672    | 459    | 239    | 114    |
| N of patients with event      |      | 161    | 222    | 255    | 279    | 293    |
| Cumulative incidence          |      | 14%    | 21%    | 25%    | 30%    | 36%    |

F.

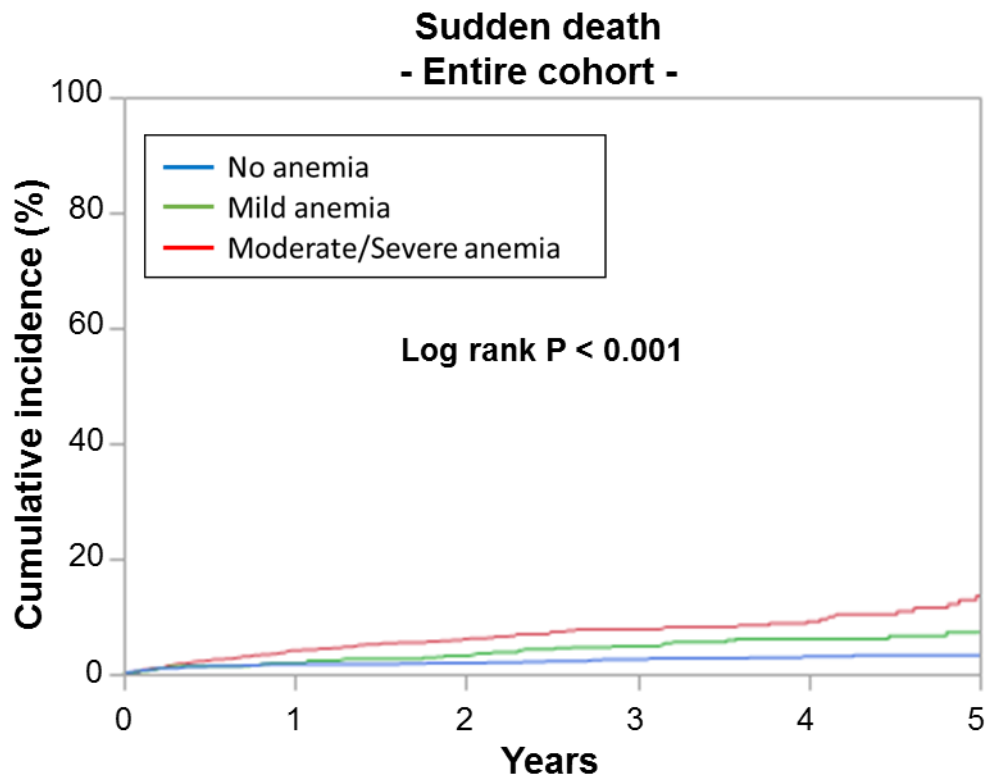

|                               | 0    | 1 year | 2 year | 3 year | 4 year | 5 year |
|-------------------------------|------|--------|--------|--------|--------|--------|
| <b>No anemia</b>              |      |        |        |        |        |        |
| N of patients at risk         | 1286 | 1144   | 1062   | 808    | 517    | 279    |
| N of patients with event      |      | 21     | 24     | 30     | 33     | 34     |
| Cumulative incidence          |      | 2%     | 2%     | 3%     | 3%     | 3%     |
| <b>Mild anemia</b>            |      |        |        |        |        |        |
| N of patients at risk         | 835  | 685    | 598    | 439    | 260    | 134    |
| N of patients with event      |      | 15     | 23     | 33     | 38     | 40     |
| Cumulative incidence          |      | 2%     | 3%     | 5%     | 6%     | 7%     |
| <b>Moderate/Severe anemia</b> |      |        |        |        |        |        |
| N of patients at risk         | 1282 | 857    | 672    | 459    | 239    | 114    |
| N of patients with event      |      | 43     | 60     | 70     | 75     | 83     |
| Cumulative incidence          |      | 4%     | 6%     | 8%     | 9%     | 14%    |

G.

**Non-cardiovascular death  
- Entire cohort -**

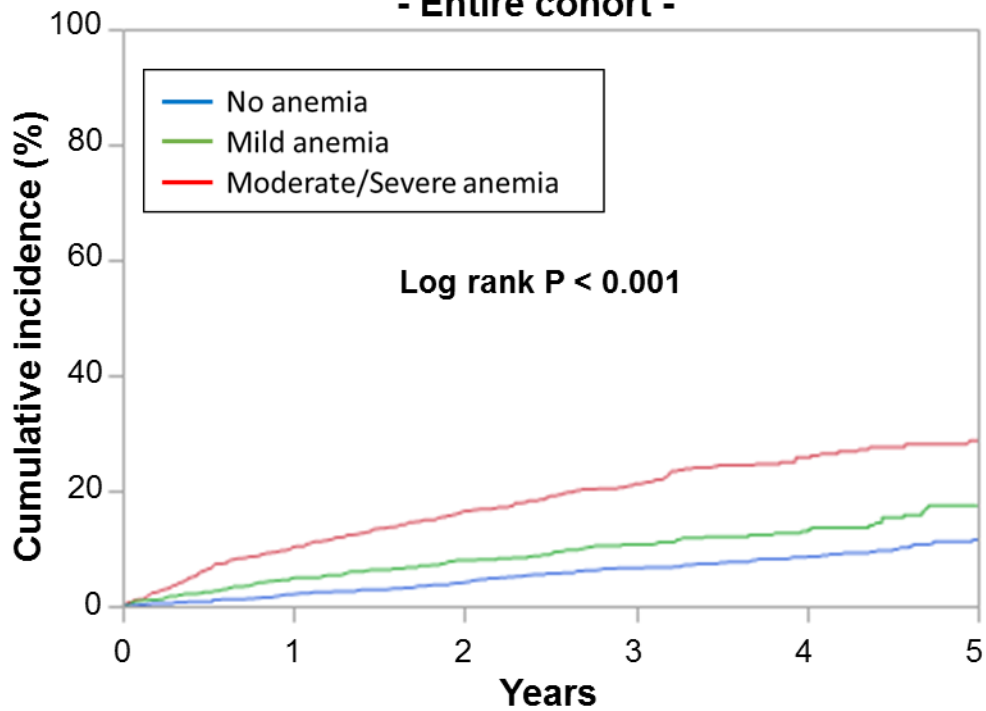

|                               | 0    | 1 year | 2 year | 3 year | 4 year | 5 year |
|-------------------------------|------|--------|--------|--------|--------|--------|
| <b>No anemia</b>              |      |        |        |        |        |        |
| N of patients at risk         | 1286 | 1144   | 1062   | 808    | 517    | 279    |
| N of patients with event      |      | 26     | 48     | 74     | 87     | 100    |
| Cumulative incidence          |      | 2%     | 4%     | 7%     | 8%     | 12%    |
| <b>Mild anemia</b>            |      |        |        |        |        |        |
| N of patients at risk         | 835  | 685    | 598    | 439    | 259    | 134    |
| N of patients with event      |      | 38     | 58     | 74     | 83     | 93     |
| Cumulative incidence          |      | 5%     | 8%     | 11%    | 13%    | 17%    |
| <b>Moderate/Severe anemia</b> |      |        |        |        |        |        |
| N of patients at risk         | 1282 | 857    | 672    | 459    | 239    | 114    |
| N of patients with event      |      | 112    | 167    | 200    | 222    | 229    |
| Cumulative incidence          |      | 10%    | 17%    | 21%    | 26%    | 29%    |



Supplemental Figure S2

| Variables                   | Subpopulation               | Severity of anemia | Cumulative 5-year incidence/Number at risk (Cumulative 5-year event rate %) | Unadjusted HR (95% CI) | P value | Adjusted HR (95% CI) | P value | Adjusted HR (95% CI) |      | P for interaction |
|-----------------------------|-----------------------------|--------------------|-----------------------------------------------------------------------------|------------------------|---------|----------------------|---------|----------------------|------|-------------------|
|                             |                             |                    |                                                                             |                        |         |                      |         | 0.1                  | 1 10 |                   |
| <b>Age</b>                  | Age <80                     | No                 | 109/893 (16%)                                                               | 1 (reference)          |         | 1 (reference)        |         |                      | 0.09 |                   |
|                             |                             | Mild               | 95/463 (26%)                                                                | 1.75 (1.35-2.27)       | <0.001  | 1.06 (0.8-1.41)      | 0.7     |                      |      |                   |
|                             |                             | Moderate/Severe    | 150/490 (42%)                                                               | 3.29 (2.61-4.17)       | <0.001  | 1.65 (1.25-2.18)     | <0.001  |                      |      |                   |
|                             | Age ≥80                     | No                 | 100/393 (38%)                                                               | 1 (reference)          |         | 1 (reference)        |         |                      |      |                   |
|                             |                             | Mild               | 119/372 (48%)                                                               | 1.34 (1.04-1.74)       | 0.02    | 1.46 (1.12-1.92)     | 0.006   |                      |      |                   |
|                             |                             | Moderate/Severe    | 332/792 (68%)                                                               | 2.23 (1.8-2.78)        | <0.001  | 1.52 (1.19-1.93)     | <0.001  |                      |      |                   |
| <b>AS-related symptoms</b>  | Asymptomatic                | No                 | 78/638 (17%)                                                                | 1 (reference)          |         | 1 (reference)        |         | 0.5                  |      |                   |
|                             |                             | Mild               | 98/408 (34%)                                                                | 2.11 (1.6-2.79)        | <0.001  | 1.57 (1.16-2.12)     | 0.004   |                      |      |                   |
|                             |                             | Moderate/Severe    | 117/455 (41%)                                                               | 2.92 (2.23-3.84)       | <0.001  | 1.88 (1.38-2.57)     | <0.001  |                      |      |                   |
|                             | Symptomatic                 | No                 | 131/648 (26%)                                                               | 1 (reference)          |         | 1 (reference)        |         |                      |      |                   |
|                             |                             | Mild               | 116/427 (34%)                                                               | 1.46 (1.15-1.86)       | 0.002   | 1.12 (0.87-1.45)     | 0.4     |                      |      |                   |
|                             |                             | Moderate/Severe    | 365/827 (64%)                                                               | 3.12 (2.58-3.8)        | <0.001  | 1.43 (1.14-1.79)     | 0.002   |                      |      |                   |
| <b>Severity of AS</b>       | Vmax <5m/s                  | No                 | 177/1025 (24%)                                                              | 1 (reference)          |         | 1 (reference)        |         | 1                    |      |                   |
|                             |                             | Mild               | 178/664 (37%)                                                               | 1.74 (1.42-2.12)       | 0.005   | 1.34 (1.09-1.65)     | 0.006   |                      |      |                   |
|                             |                             | Moderate/Severe    | 398/1051 (58%)                                                              | 3.24 (2.73-3.84)       | <0.001  | 1.63 (1.34-1.99)     | <0.001  |                      |      |                   |
|                             | Vmax ≥5m/s                  | No                 | 32/261 (14%)                                                                | 1 (reference)          |         | 1 (reference)        |         |                      |      |                   |
|                             |                             | Mild               | 36/171 (26%)                                                                | 1.7 (1.08-2.69)        | 0.02    | 1.17 (0.7-1.97)      | 0.6     |                      |      |                   |
|                             |                             | Moderate/Severe    | 84/231 (47%)                                                                | 3.72 (2.54-5.55)       | <0.001  | 1.33 (0.83-2.13)     | 0.2     |                      |      |                   |
| <b>LV systolic function</b> | EF ≥50%                     | No                 | 164/1108 (20%)                                                              | 1 (reference)          |         | 1 (reference)        |         | 0.3                  |      |                   |
|                             |                             | Mild               | 167/718 (32%)                                                               | 1.65 (1.35-2.03)       | <0.001  | 1.24 (1.002-1.53)    | 0.048   |                      |      |                   |
|                             |                             | Moderate/Severe    | 354/1019 (52%)                                                              | 3.31 (2.78-3.95)       | <0.001  | 1.62 (1.32-1.98)     | <0.001  |                      |      |                   |
|                             | EF <50%                     | No                 | 45/178 (32%)                                                                | 1 (reference)          |         | 1 (reference)        |         |                      |      |                   |
|                             |                             | Mild               | 47/117 (48%)                                                                | 1.99 (1.33-2.99)       | <0.001  | 1.48 (0.93-2.34)     | 0.09    |                      |      |                   |
|                             |                             | Moderate/Severe    | 128/263 (71%)                                                               | 2.86 (2.05-4.06)       | <0.001  | 1.52 (1.2-2.3)       | 0.0501  |                      |      |                   |
| <b>Renal function</b>       | CRE ≤2mg/dl                 | No                 | 192/1246 (21%)                                                              | 1 (reference)          |         | 1 (reference)        |         | <0.001               |      |                   |
|                             |                             | Mild               | 175/711 (33%)                                                               | 1.68 (1.38-2.04)       | <0.001  | 1.41 (1.15-1.72)     | <0.001  |                      |      |                   |
|                             |                             | Moderate/Severe    | 337/922 (54%)                                                               | 3.31 (2.80-3.93)       | <0.001  | 1.73 (1.42-2.1)      | <.0001  |                      |      |                   |
|                             | CRE >2mg/dl or hemodialysis | No                 | 17/40 (52%)                                                                 | 1 (reference)          |         | 1 (reference)        |         |                      |      |                   |
|                             |                             | Mild               | 39/124 (44%)                                                                | 0.66 (0.38-1.19)       | 0.2     | 0.4 (0.22-0.77)      | 0.005   |                      |      |                   |
|                             |                             | Moderate/Severe    | 145/360 (63%)                                                               | 0.96 (0.60-1.65)       | 0.9     | 0.5 (0.3-0.95)       | 0.03    |                      |      |                   |

Supplemental Figure S3

A.

**Surgical AVR or TAVI  
- Conservative stratum -**

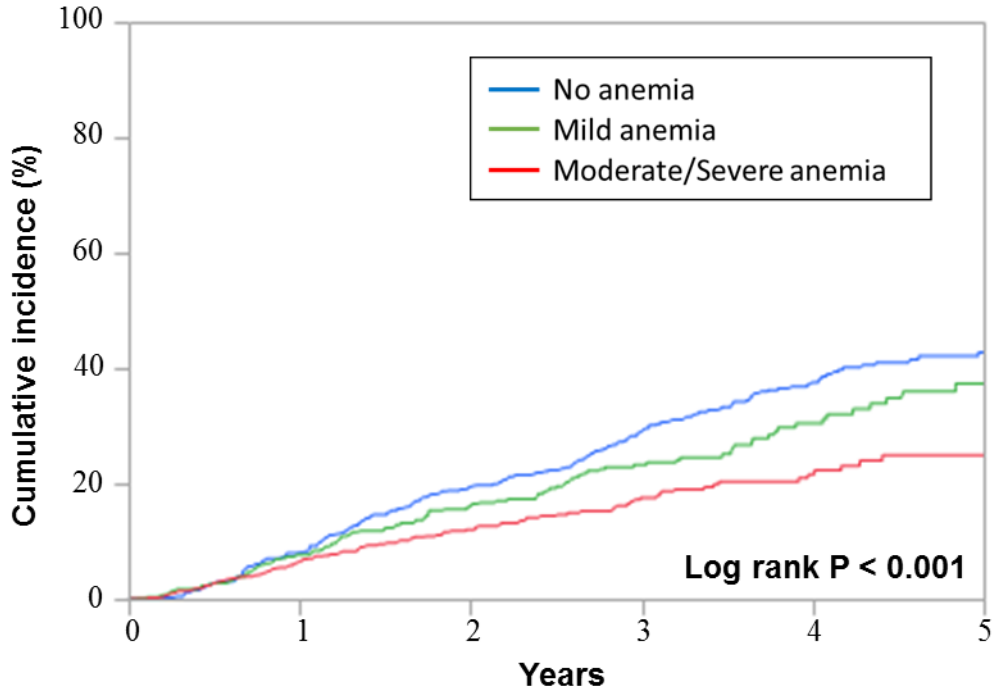

|                               | 0   | 1 year | 2 year | 3 year | 4 year | 5 year |
|-------------------------------|-----|--------|--------|--------|--------|--------|
| <b>No anemia</b>              |     |        |        |        |        |        |
| N of patients at risk         | 737 | 584    | 457    | 308    | 180    | 81     |
| N of patients with event      |     | 54     | 124    | 172    | 202    | 214    |
| Cumulative incidence          |     | 8%     | 20%    | 29%    | 38%    | 43%    |
| <b>Mild anemia</b>            |     |        |        |        |        |        |
| N of patients at risk         | 519 | 382    | 295    | 197    | 95     | 42     |
| N of patients with event      |     | 34     | 67     | 89     | 102    | 109    |
| Cumulative incidence          |     | 8%     | 16%    | 23%    | 30%    | 37%    |
| <b>Moderate/Severe anemia</b> |     |        |        |        |        |        |
| N of patients at risk         | 969 | 569    | 388    | 234    | 114    | 50     |
| N of patients with event      |     | 46     | 76     | 96     | 105    | 109    |
| Cumulative incidence          |     | 6%     | 12%    | 18%    | 22%    | 25%    |

B.

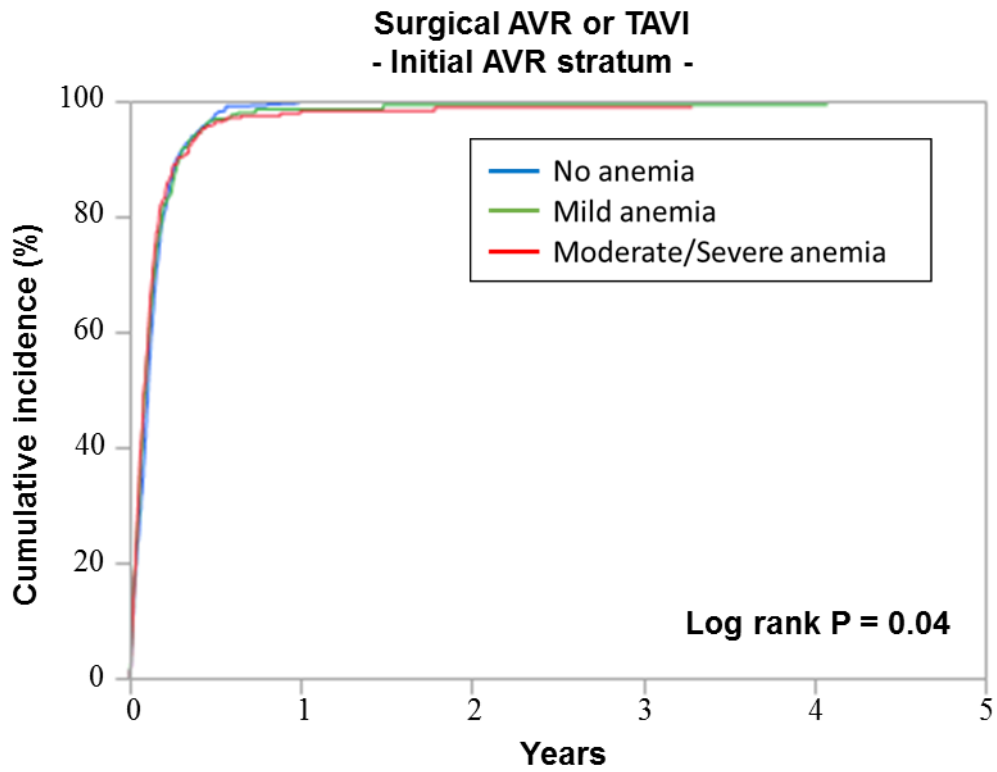

|                               | 0   | 1 year |
|-------------------------------|-----|--------|
| <b>No anemia</b>              |     |        |
| N of patients at risk         | 549 | 1      |
| N of patients with event      |     | 543    |
| Cumulative incidence          |     | 100%   |
| <b>Mild anemia</b>            |     |        |
| N of patients at risk         | 316 | 2      |
| N of patients with event      |     | 308    |
| Cumulative incidence          |     | 99%    |
| <b>Moderate/Severe anemia</b> |     |        |
| N of patients at risk         | 313 | 4      |
| N of patients with event      |     | 303    |
| Cumulative incidence          |     | 98%    |

## **Supplemental Figure Legends**

### **Supplemental Figure S1**

Cumulative incidences of surgical AVR or TAVI and the secondary outcome measures in the no, mild, and moderate/severe anemia groups in the entire cohort.

AVR=aortic valve replacement; TAVI=transcatheter aortic valve implantation

### **Supplemental Figure S2**

Subgroup analyses for the crude risks of mild and moderate/severe anemia relative to no anemia for the primary outcome measure.

AS=aortic stenosis; EF=ejection fraction; eGFR=estimated glomerular filtration rate;

HR=hazard ratio; LV=left ventricular

### **Supplemental Figure S3**

Kaplan–Meier curves for the cumulative incidences of surgical AVR or TAVI in the conservative stratum (A) and in the initial AVR stratum (B).

AVR=aortic valve replacement; TAVI=transcatheter aortic valve implantation
